# Supplementary material
Source: publisher figshare collection journal article supplement (https://acs.figshare.com/ndownloader/files/5133277)

**Figure S1.** Electronic spectrum of  $[\{\text{Os}(\text{PPh}_3)_2(\text{pap})\}_2(\text{ca})]^{2+}$  complex in acetonitrile solution.

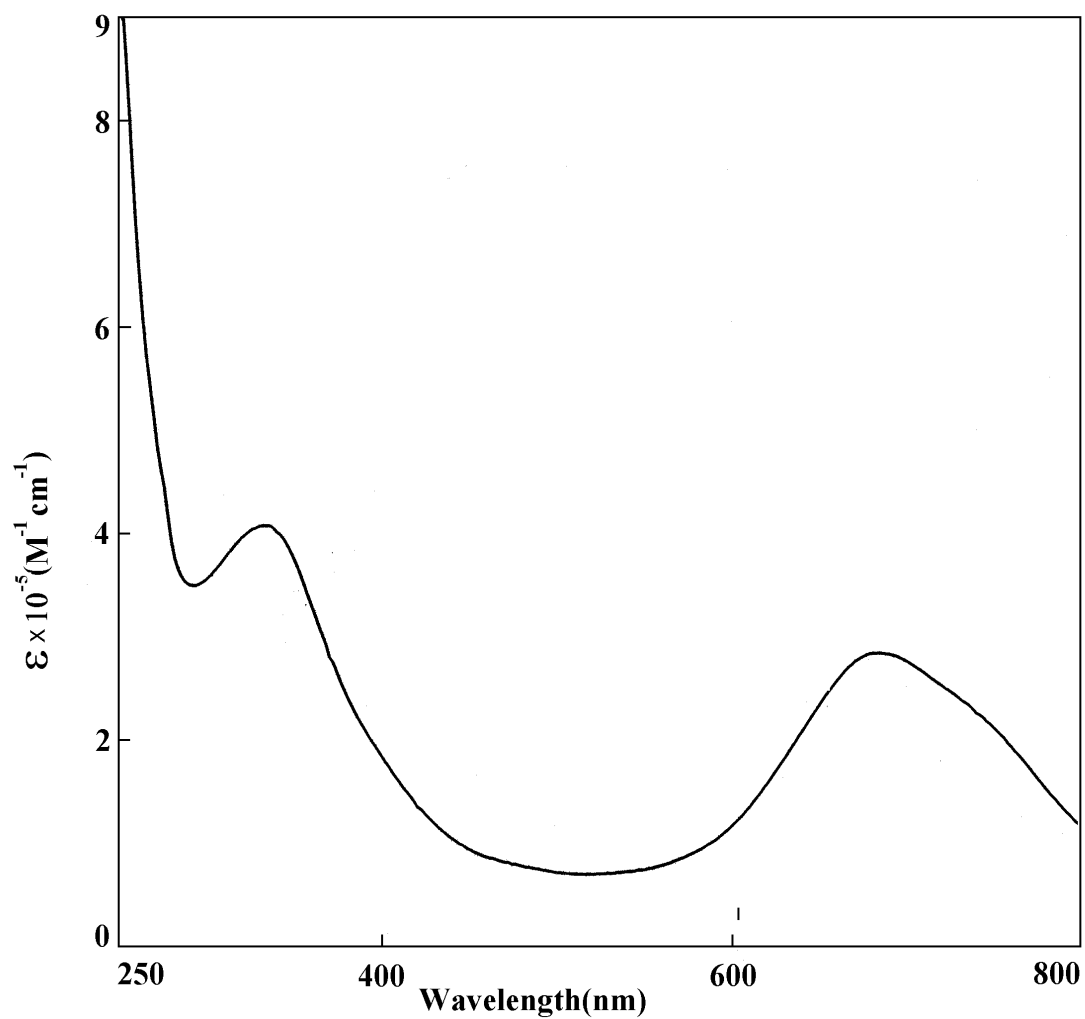

**Figure S2.** Electronic spectrum of  $[\{\text{Os}(\text{PPh}_3)_2(\text{pap})\}_2(\text{ca})]^{2+}$  complex in acetonitrile solution.

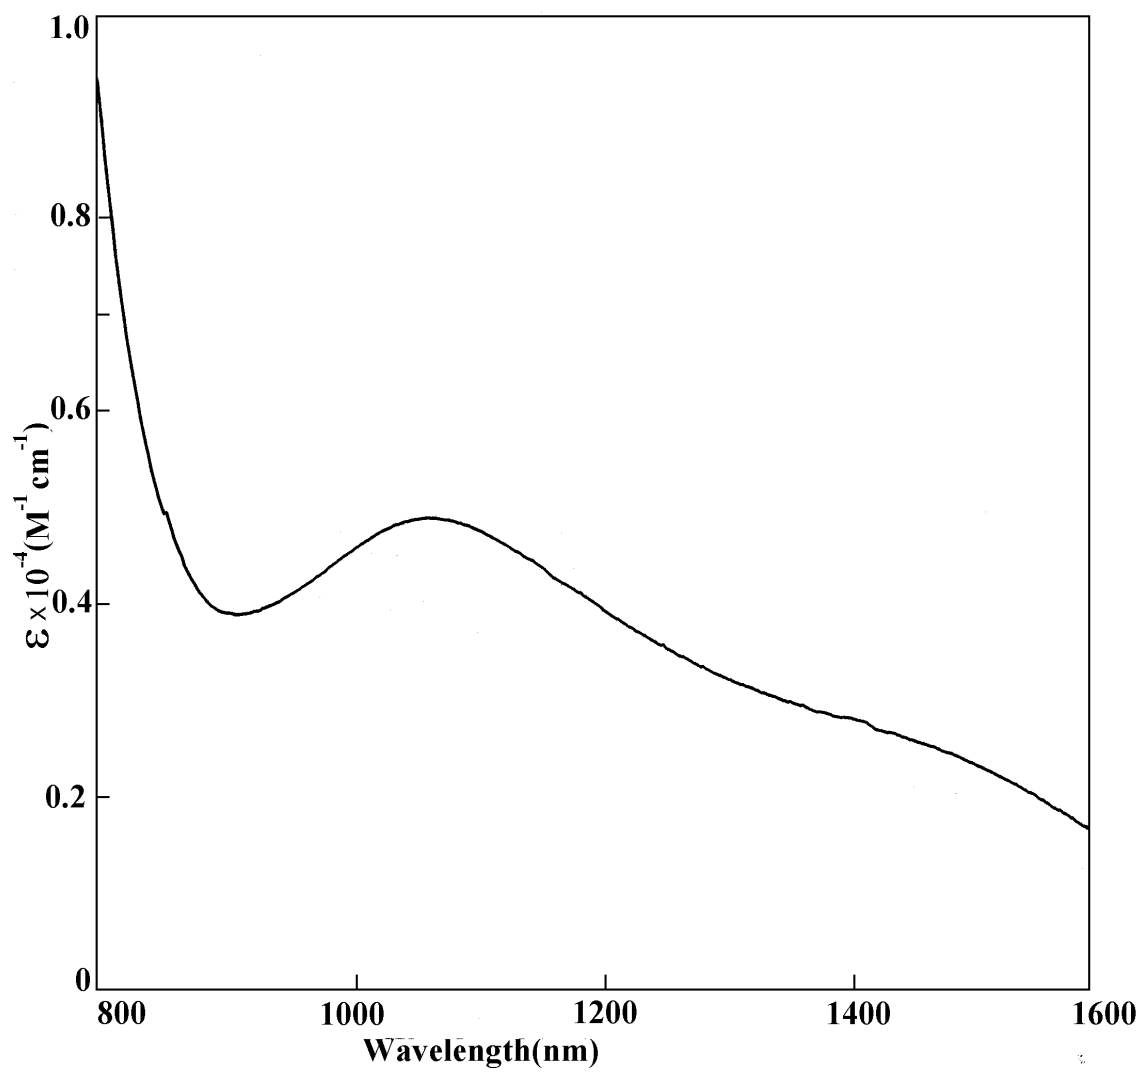

**Figure S3.** Electronic spectrum of  $[\{\text{Os}^{\text{II}}(\text{PPh}_3)_2(\text{pap}) \text{Os}^{\text{III}}(\text{PPh}_3)_2(\text{pap})\}(\text{ca})]^{3+}$  complex in acetonitrile solution.

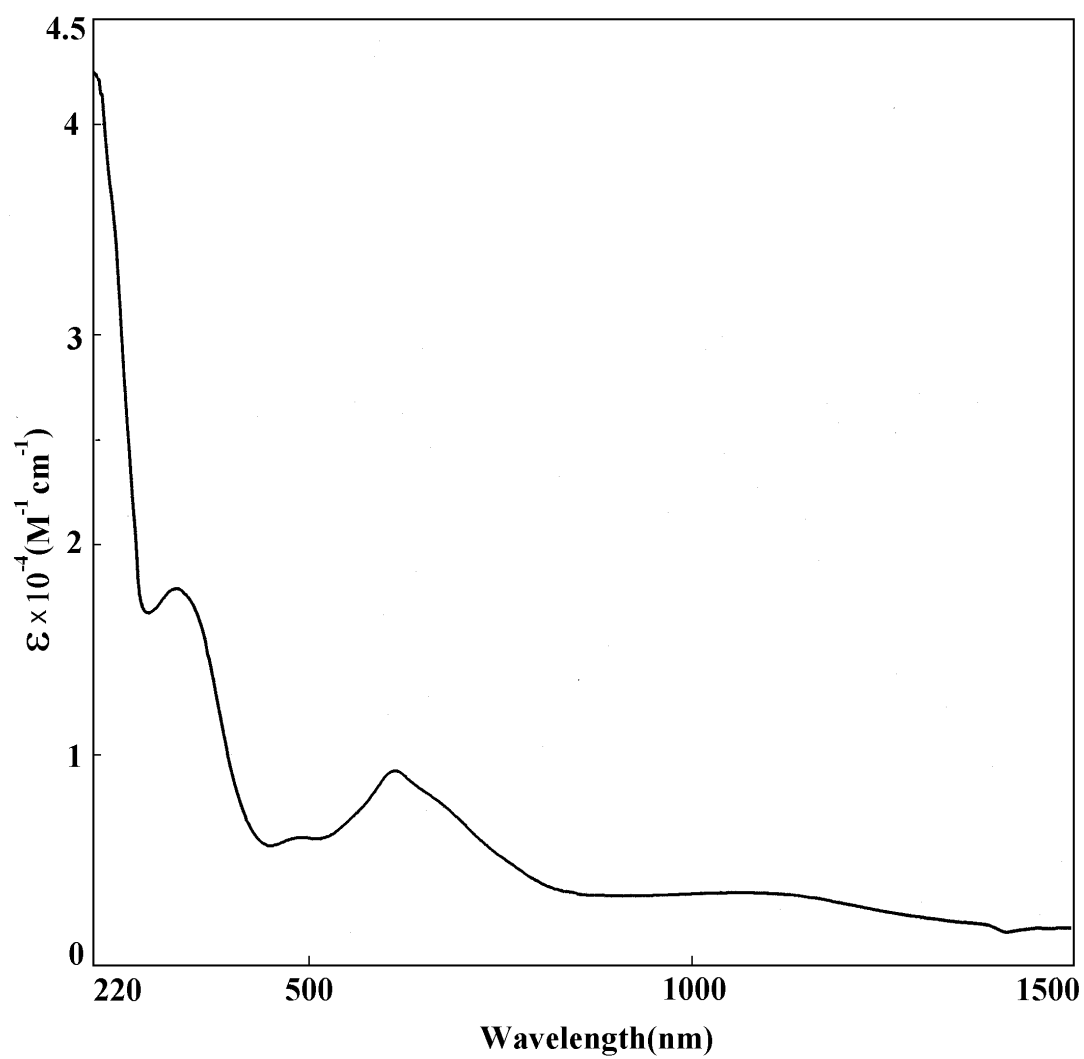

**Figure S4.** Electronic spectrum of  $[\{\text{Os}^{\text{II}}(\text{PPh}_3)_2(\text{pap}) \text{Os}^{\text{III}}(\text{PPh}_3)_2(\text{pap})\}(\text{ca})]^{3+}$  complex in acetonitrile solution.

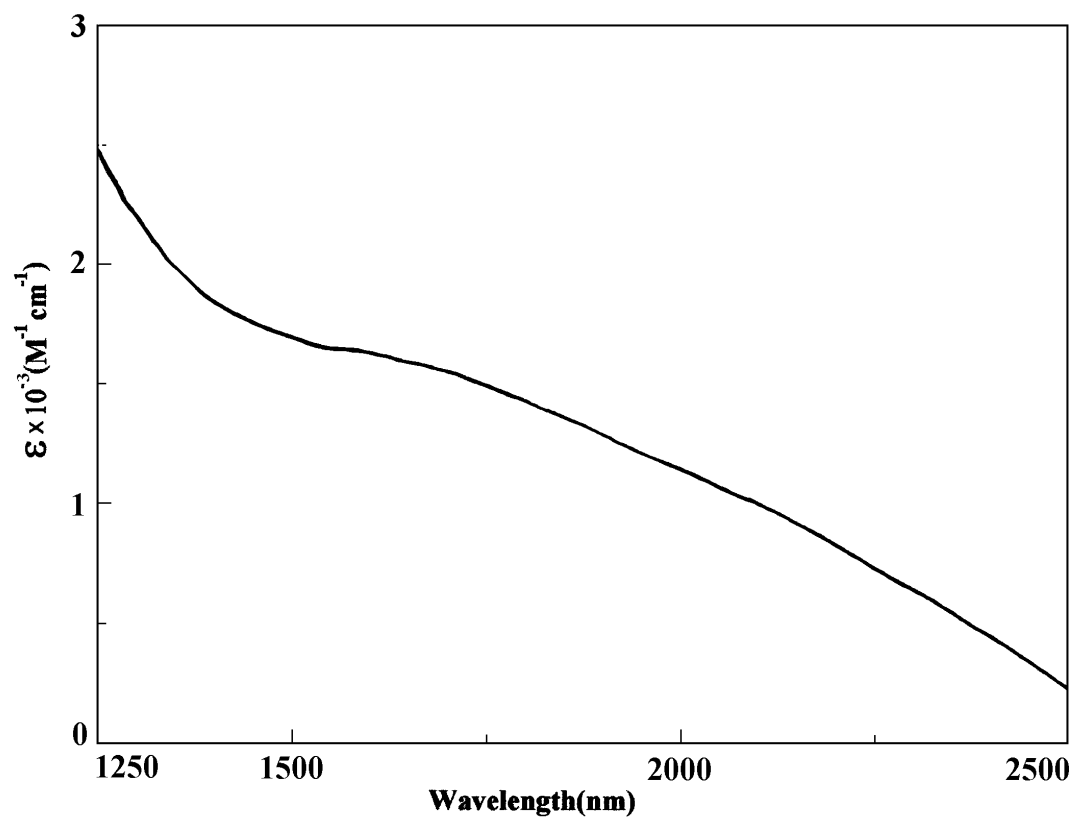

**Figure S5.** Electronic spectrum of [ $\{\text{Os}(\text{PPh}_3)_2(\text{pap})(\text{ca})\}$ ] complex in acetonitrile solution.

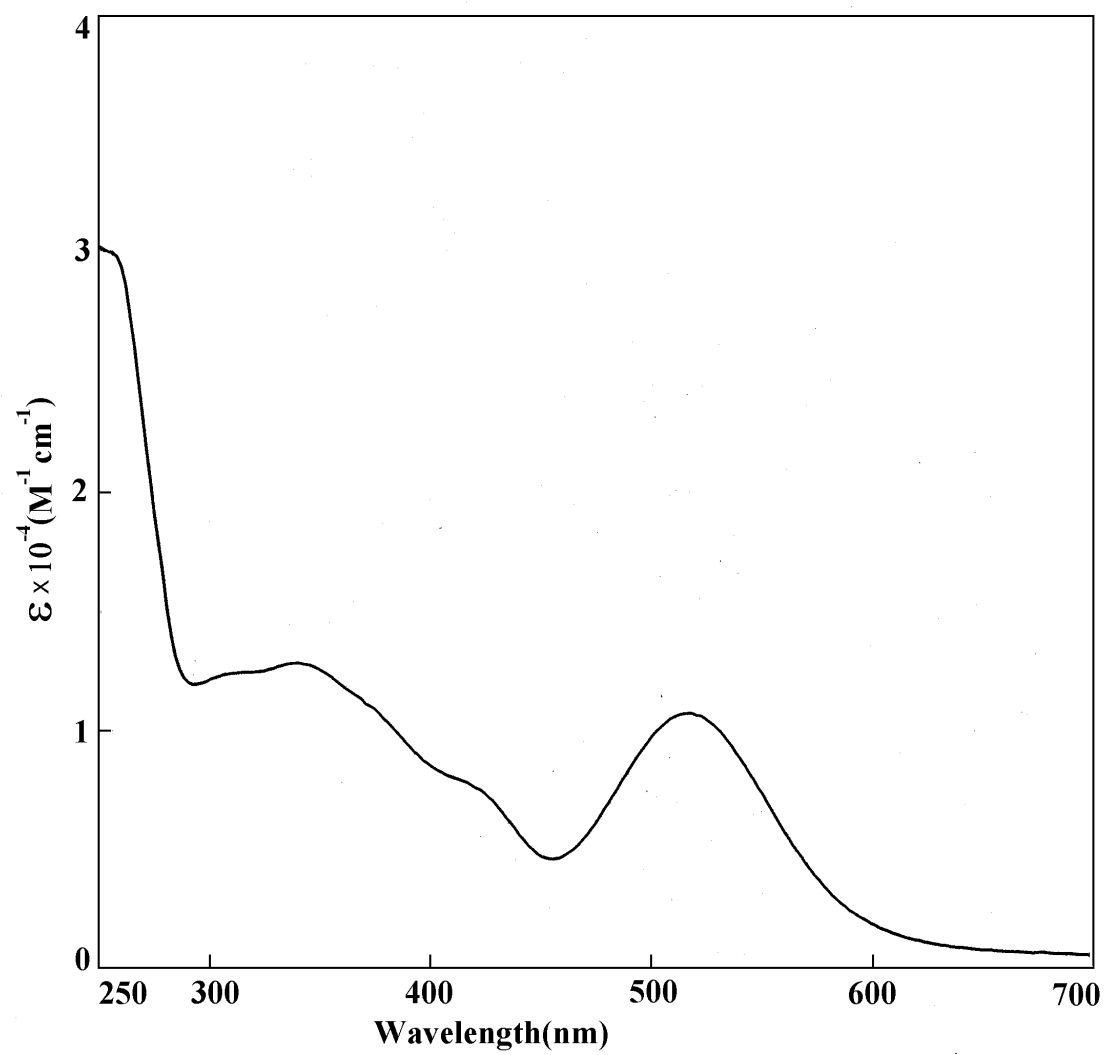

**Figure S6.** Electronic spectrum of [ $\{\text{Os}(\text{PPh}_3)_2(\text{pap})(\text{ca})\}$ ] complex in acetonitrile solution.

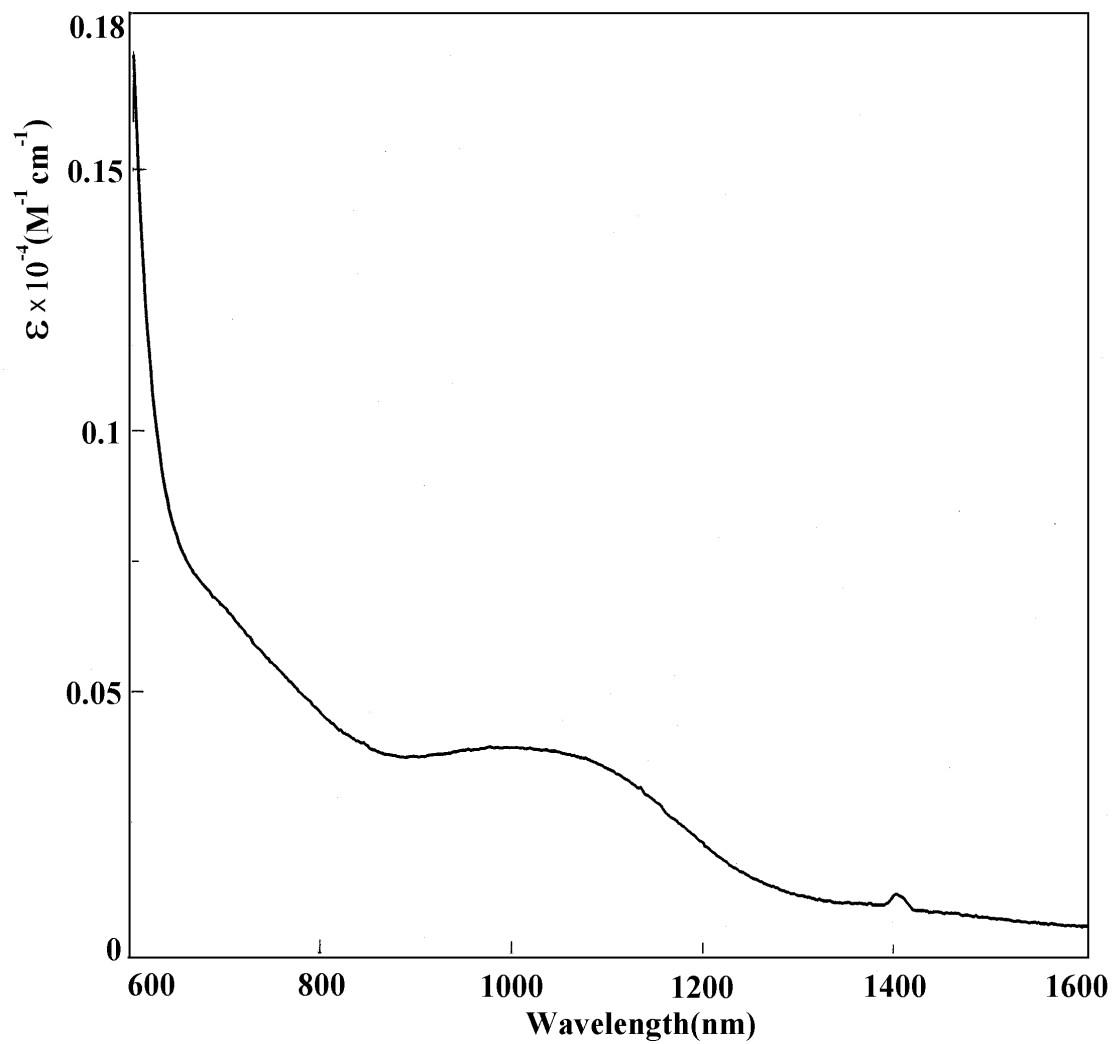

**Figure S7.** Electronic spectrum of  $[\{\text{Os}(\text{PPh}_3)_2(\text{CO})\}_2(\text{r-ca})]$  complex in 1:9 dichloromethane-acetonitrile solution.

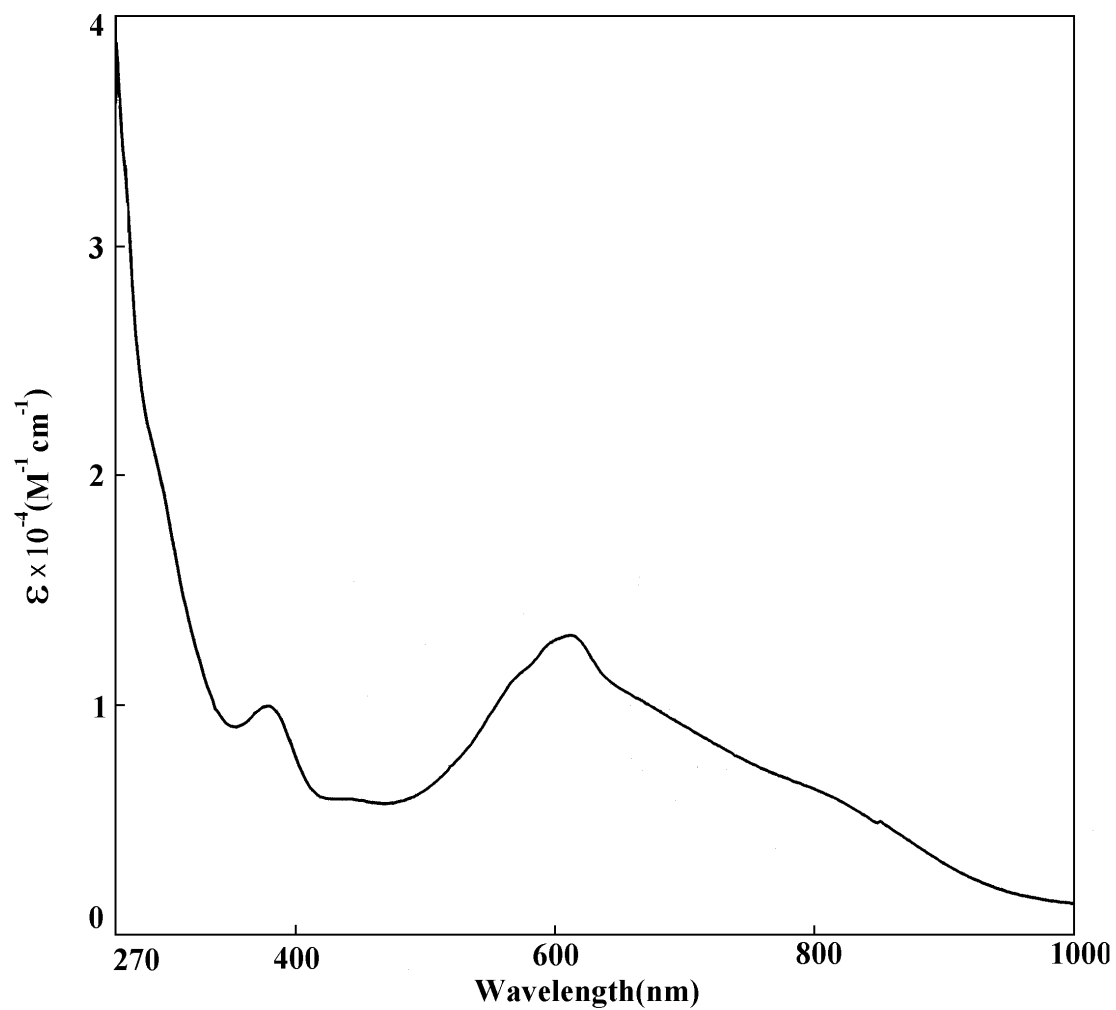

**Figure S8.** Cyclic voltammogram of  $[\{\text{Os}(\text{PPh}_3)_2(\text{pap})\}_2(\text{ca})]^{2+}$  complex in acetonitrile solution (0.1 M TBAP) at a scan rate of  $50 \text{ mVs}^{-1}$ .

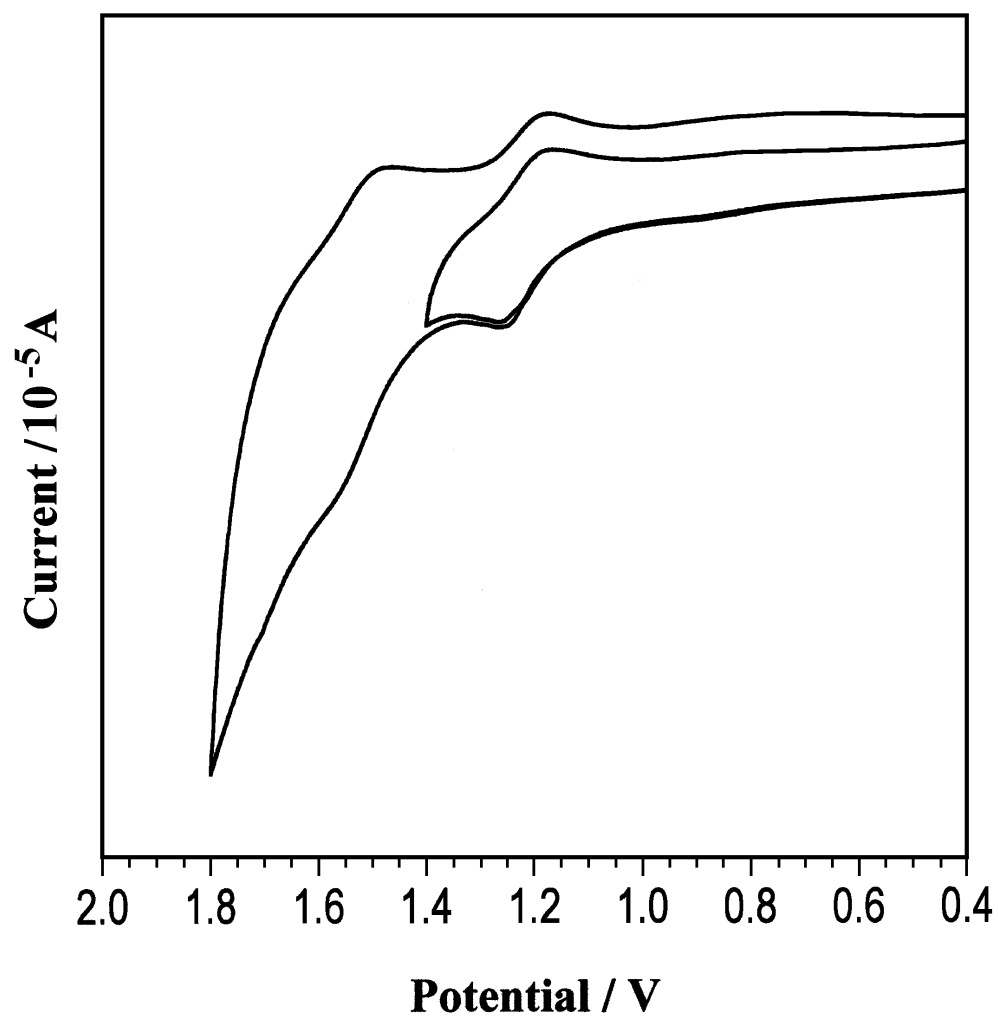



**Figure S9.** Cyclic voltammogram of  $[\text{Os}(\text{PPh}_3)_2(\text{pap})(\text{ca})]$  complex in acetonitrile solution (0.1 M TBAP) at a scan rate of  $50 \text{ mVs}^{-1}$ .

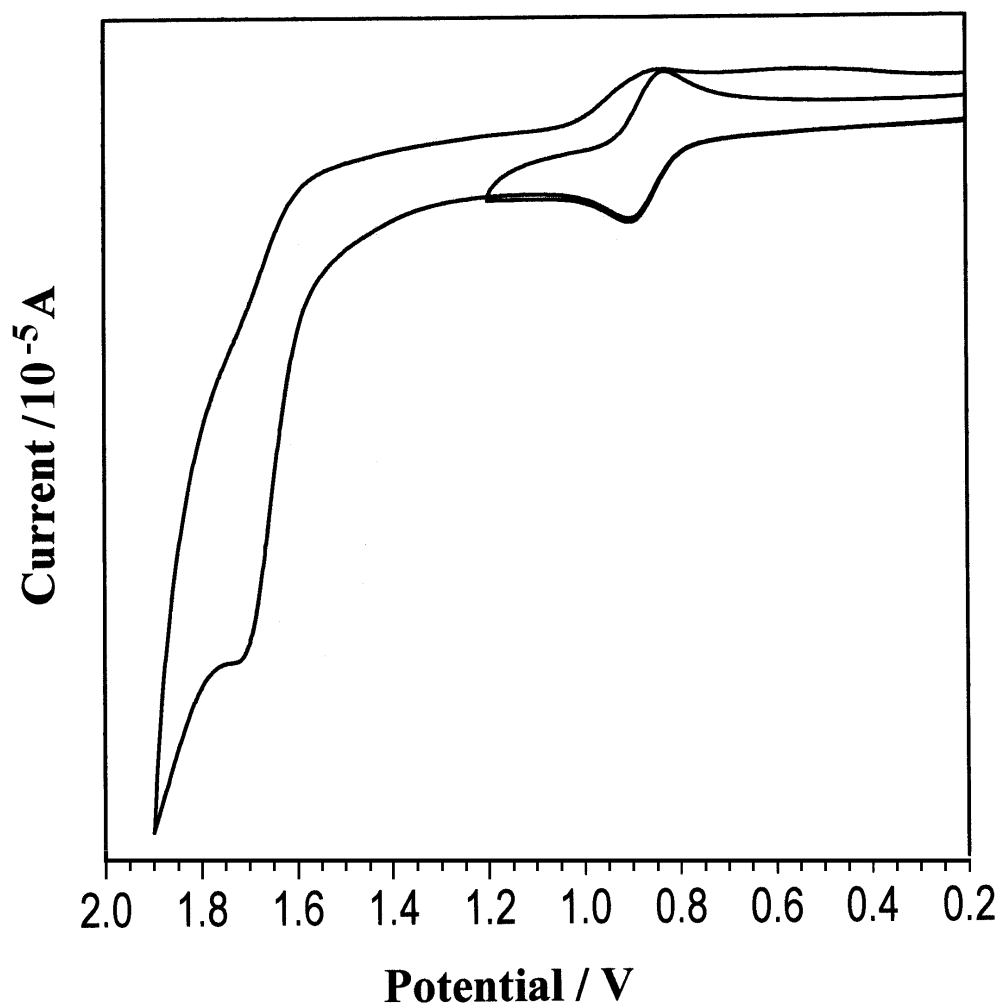

**Figure S10.** Cyclic voltammogram of  $[\{\text{Os}(\text{PPh}_3)_2(\text{CO})\}_2(\text{r-ca})]$  complex in 1:9 dichloromethane-acetonitrile solution (0.1 M TBAP) at a scan rate of  $50 \text{ mVs}^{-1}$ .

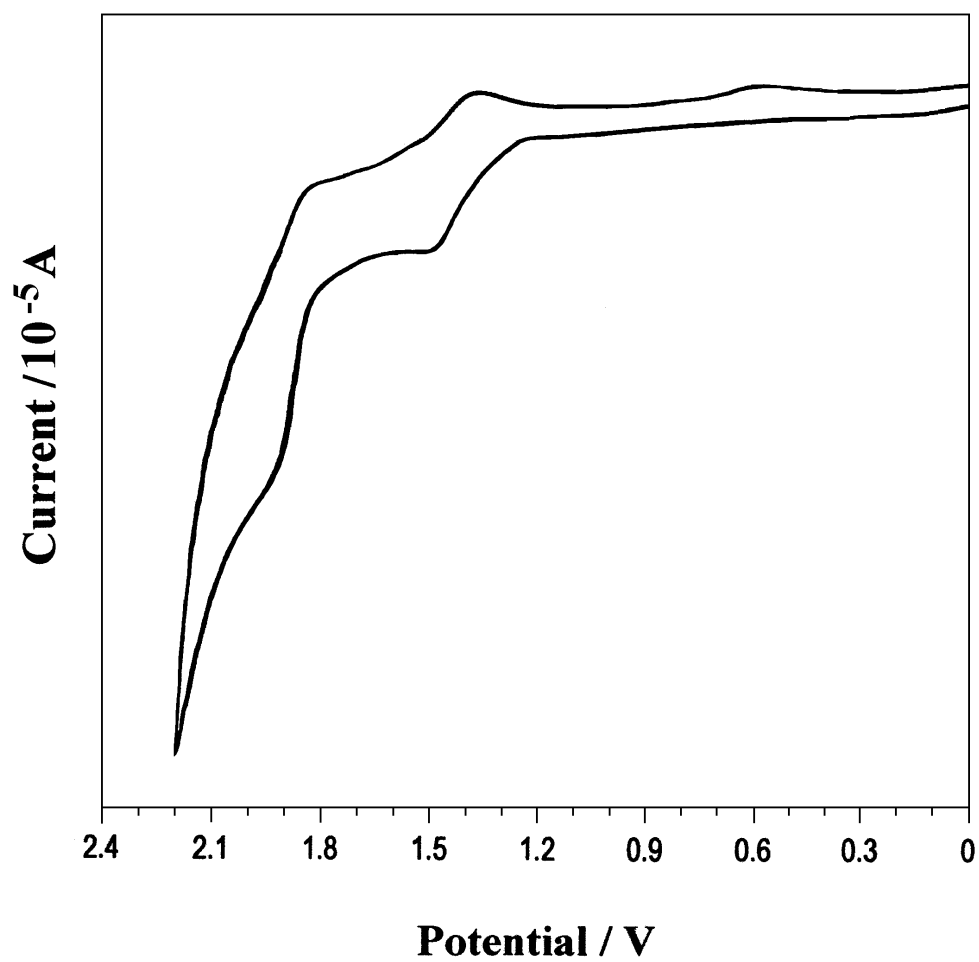

Supplement: Supplementary file 1 [file 5133277]
